# Supplementary material
Source: MDPI journal article supplement (https://www.mdpi.com/2227-9717/10/8/1540)
Supplement: s1 [file s1]

## Supporting Information

# Nitrogen Removal from the High Nitrate Content Saline Denitration Solution of a Coal-Fired Power Plant by MFC

Shaoan Cheng \*, Zhipeng Huang and Zhihua Wang

State Key Laboratory of Clean Energy Utilization, Department of Energy Engineering, Zhejiang University, Hangzhou 310027, China

\* Correspondence: shaoancheng@zju.edu.cn

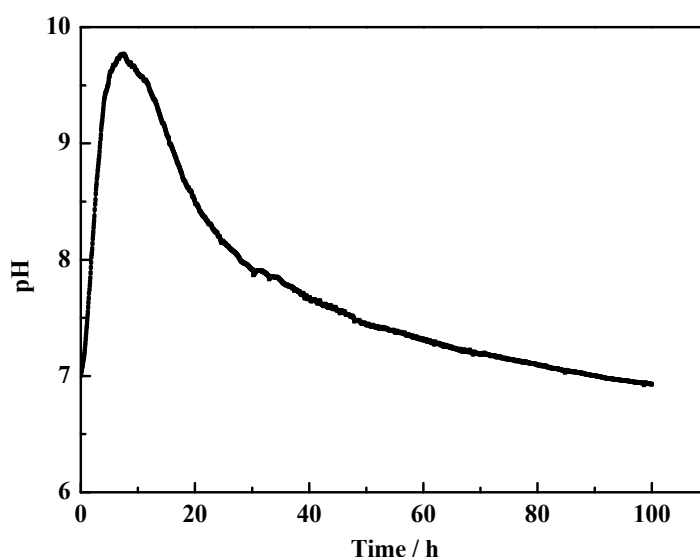

**Figure S1.** Change of anodic pH at 6.5 g/L COD and 1510 mg/L  $\text{NO}_3^-$ -N.

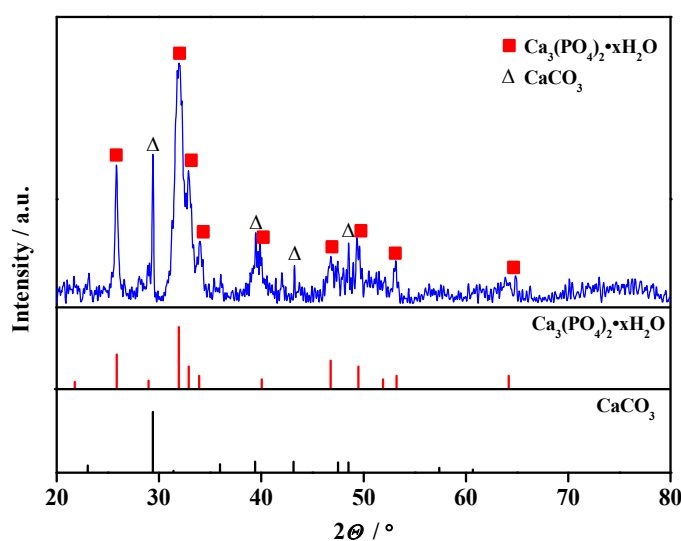

**Figure S2.** XRD pattern of precipitate at anodic surface.
